# Supplementary material
Source: HighWire-hosted journal article supplement (https://jitc.bmj.com/content/9/10/e003468)

Figure S2

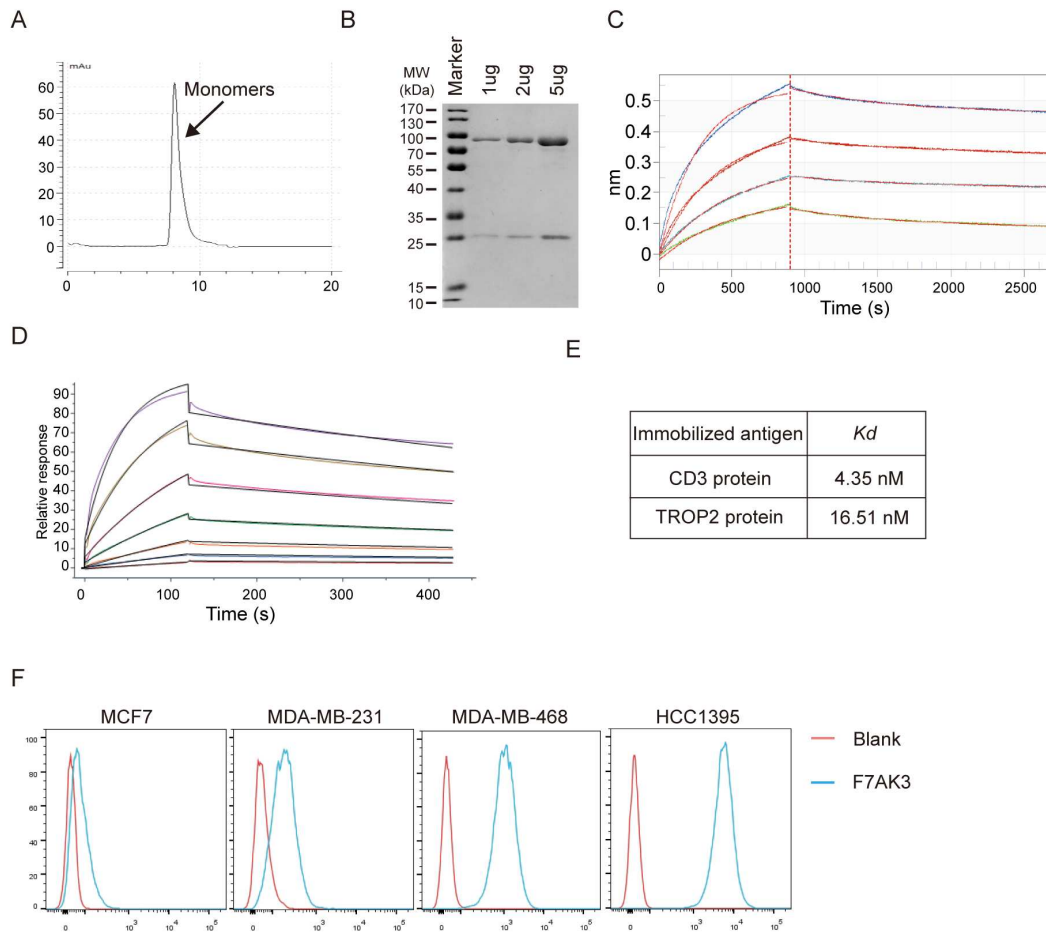

Supplement: inline-supplementary-material-4 [file inline-supplementary-material-4.pdf]

Figure S3

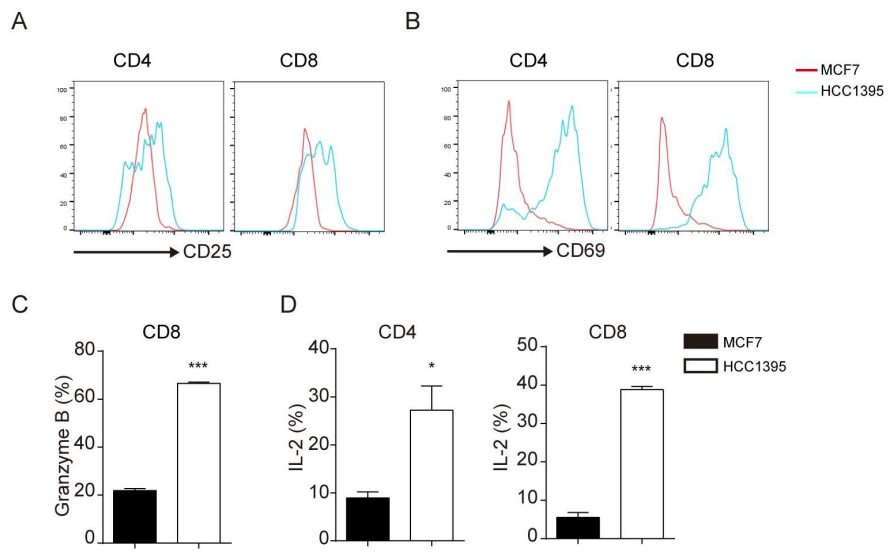

Supplement: inline-supplementary-material-5 [file inline-supplementary-material-5.pdf]

Figure S6

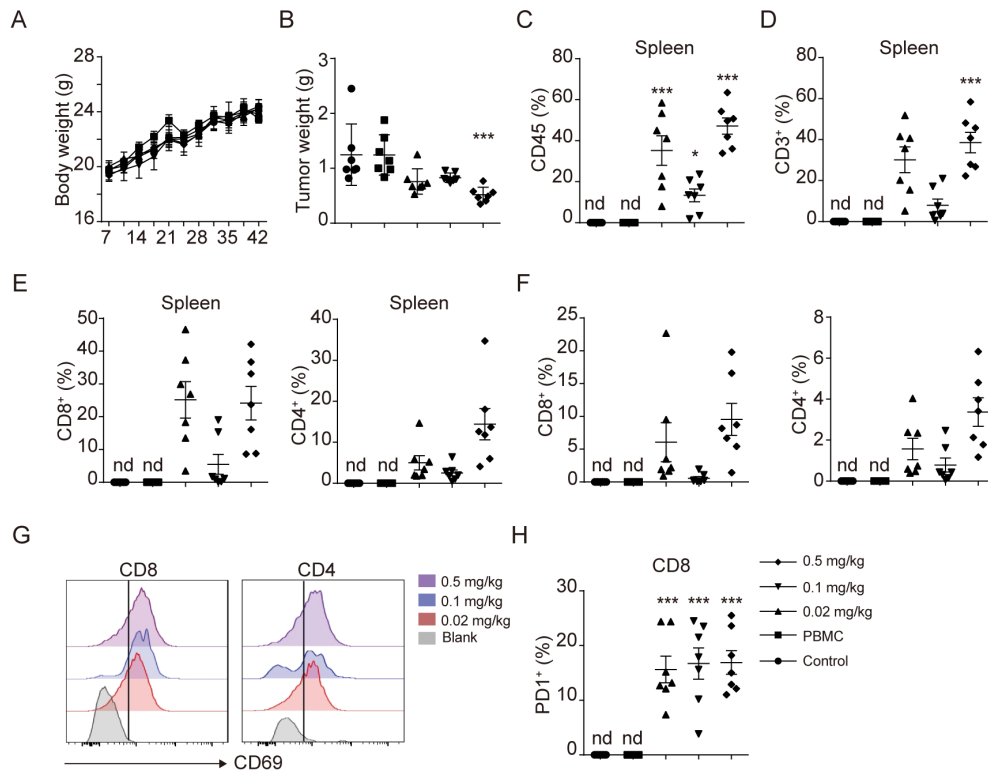

Supplement: inline-supplementary-material-8 [file inline-supplementary-material-8.pdf]
